# Supplementary material for: Direct measurement of N 2 O 5 heterogeneous uptake coefficients on atmospheric aerosols in southwestern China and evaluation of current parameterizations
Source: Copernicus journal article supplement (doi:10.5194/egusphere-2024-3804), 2025-01-14
Supplement: Supplementary file 1 [file egusphere-2024-3804-supplement.pdf]

# 1 **Supplementary Information**

## 2 3 **Direct measurement of N<sub>2</sub>O<sub>5</sub> heterogeneous uptake** 4 **coefficients on atmospheric aerosols in southwestern** 5 **China and evaluation of current parameterizations**

6  
7 Jiayin Li <sup>a,†</sup>, Tianyu Zhai <sup>a,b,†</sup>, Xiaorui Chen <sup>c\*</sup>, Haichao Wang <sup>c</sup>, Shuyang Xie <sup>a</sup>, Shiyi  
8 Chen <sup>a</sup>, Chunmeng Li <sup>a,d</sup>, Huabin, Dong <sup>a</sup>, Keding Lu <sup>a\*</sup>

9  
10 <sup>a</sup> State Key Joint Laboratory of Environmental Simulation and Pollution Control,  
11 College of Environmental Science and Engineering, Peking University, Beijing 100871,  
12 China

13 <sup>b</sup> State Environmental Protection Key Laboratory of Vehicle Emission Control and  
14 Simulation, Chinese Research Academy of Environmental Sciences, Beijing, 100012,  
15 China

16 <sup>c</sup> School of Atmospheric Sciences, Sun Yat-sen University, and Southern Marine  
17 Science and Engineering Guangdong Laboratory (Zhuhai), Zhuhai, 519082, China

18 <sup>d</sup> The National Institute of Metrology, Center for Environmental Metrology, Beijing  
19 100029, China

20 <sup>†</sup>Jiayin Li and Tianyu Zhai contributed equally in this work.

21  
22 **Corresponding author:** Xiaorui Chen (chenxr95@mail.sysu.edu.cn) and Keding Lu  
23 (k.lu@pku.edu.cn)

25 **Contents**

26 Figure S1. Time series of measured concentrations of  $\text{NO}_2$ ,  $\text{O}_3$ ,  $\text{NO}$ ,  $\text{PM}_{2.5}$  and  $\text{N}_2\text{O}_5$ ,  
27 the values of  $\gamma(\text{N}_2\text{O}_5)$ , and meteorological parameters of RH and T during the campaign.

28 Figure S2.  $\text{NO}_3$  reactivity with VOCs.

29 Figure S3. Time series of  $\text{N}_2\text{O}_5$  and  $\text{NO}_3$  lifetime during the campaign.

30 Figure S4. The distribution of parameterized  $\gamma(\text{N}_2\text{O}_5)$  values of GRI09 (a) and BT09  
31 (b).

32 Table S1. Summary of field observation results of nocturnal  $\text{NO}_3$  and  $\text{N}_2\text{O}_5$   
33 concentrations,  $\text{P}(\text{NO}_3)$ , and  $\tau(\text{N}_2\text{O}_5)$  from various regions around the world in recent  
34 years.

35 Table S2. Summary of global field observation results of  $\gamma(\text{N}_2\text{O}_5)$ .

36 Table S3. Summary of the details and performances of the parameterizations discussed  
37 in this study.

38

39

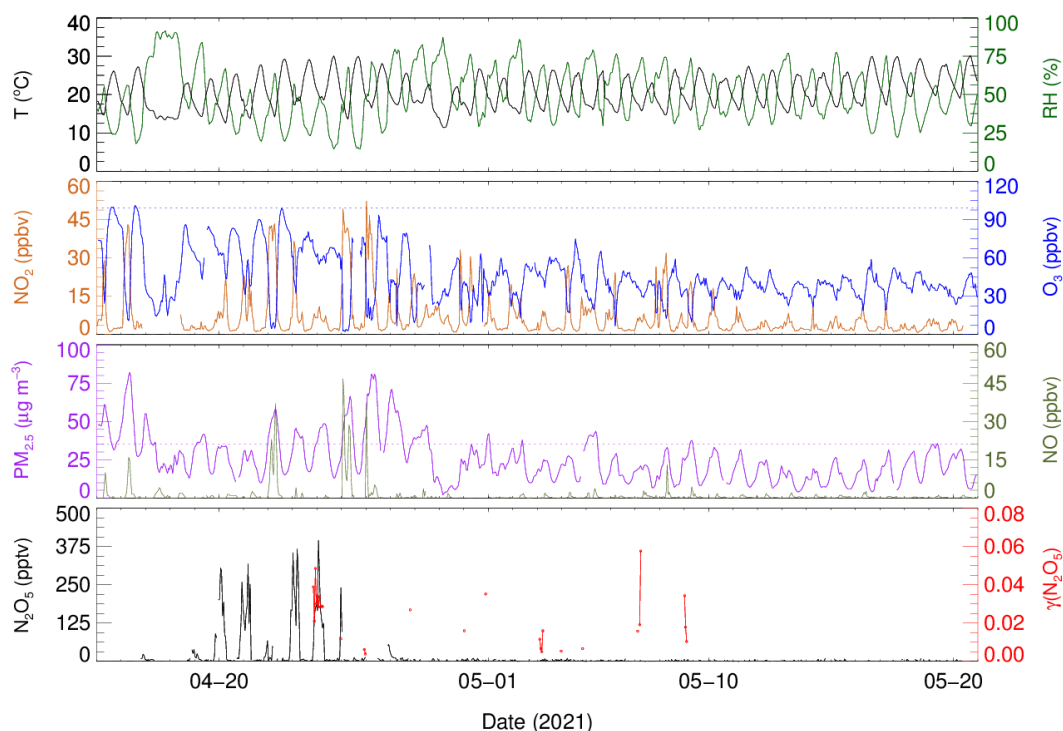

40

41 **Figure S1.** Time series of measured concentrations of  $\text{NO}_2$ ,  $\text{O}_3$ ,  $\text{NO}$ ,  $\text{PM}_{2.5}$  and  $\text{N}_2\text{O}_5$ ,  
 42 the values of  $\gamma(\text{N}_2\text{O}_5)$ , and meteorological parameters of RH and T during the campaign.  
 43 The blue line and the purple line represent Chinese national air quality standards for  $\text{O}_3$   
 44 and  $\text{PM}_{2.5}$ , respectively.

45

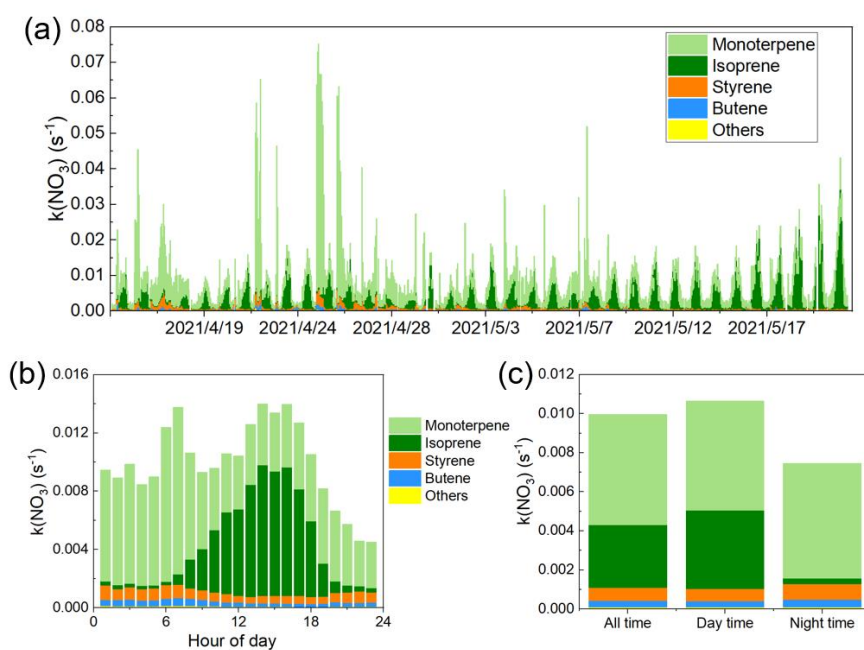

46

47 **Figure S2.**  $\text{NO}_3$  reactivity with VOCs. (a) Time series of VOCs contributions for  
 48  $k(\text{NO}_3)$ . (b) Mean diurnal profiles of  $k(\text{NO}_3)$ . (c) The contribution of VOCs categories

49 for  $k(\text{NO}_3)$ .

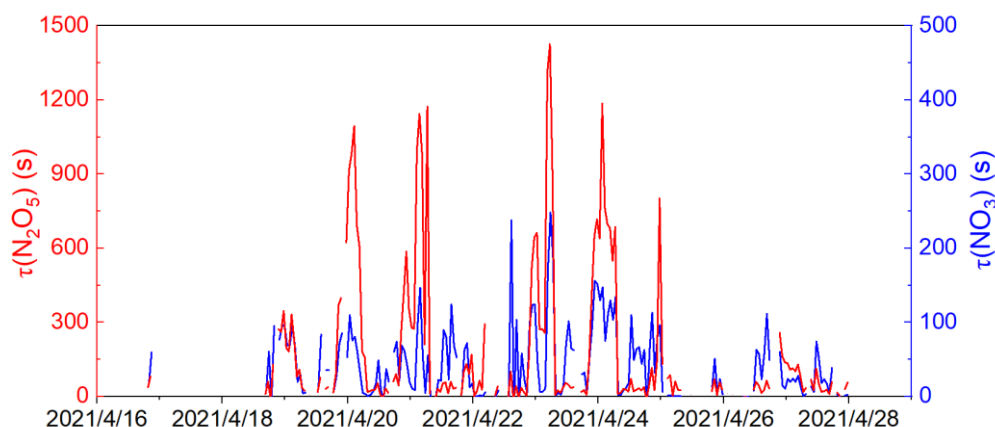

50

51 **Figure S3.** Time series of  $\text{N}_2\text{O}_5$  and  $\text{NO}_3$  lifetime during the campaign.

52

53

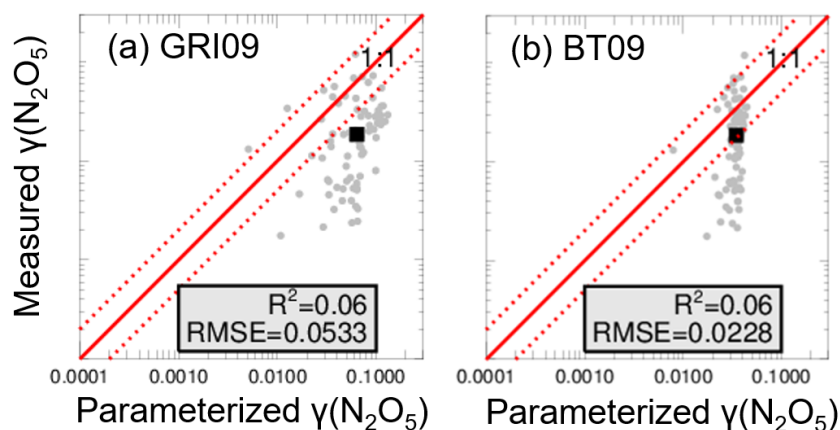

54

55 **Figure S4.** The distribution of parameterized  $\gamma(\text{N}_2\text{O}_5)$  values of GRI09 (a) and BT09  
56 (b).

57

58 **Table S1.** Summary of field observation results of nocturnal  $\text{NO}_3$  and  $\text{N}_2\text{O}_5$   
59 concentrations,  $P(\text{NO}_3)$ , and  $\tau(\text{N}_2\text{O}_5)$  from various regions around the world in recent  
60 years.

| Location          | Site type | Period  | $\text{NO}_3$ (pptv)<br>(night) | $\text{N}_2\text{O}_5$ (pptv)<br>(night) | $P(\text{NO}_3)$<br>(ppbv/h) | $\tau(\text{N}_2\text{O}_5)$<br>(s) | Reference            |
|-------------------|-----------|---------|---------------------------------|------------------------------------------|------------------------------|-------------------------------------|----------------------|
| Kunming,<br>China | Suburban  | 2021.04 | $5.7 \pm 3.2$                   | $33.4 \pm 75.2$<br>(395.1)               | $0.6 \pm 0.1$                | $185 \pm 294$                       | This work            |
| Beijing,<br>China | Rural     | 2016.05 | 27                              | $73 \pm 90$ (937)                        | $1.2 \pm 0.9$                | $270 \pm 240$                       | (Wang et al., 2018)  |
| Beijing,<br>China | Urban     | 2016.09 | -                               | 36.7                                     | $1.4 \pm 1.7$                | -                                   | (Wang et al., 2017a) |

|                             |                   |         |         |                             |           |            |                         |
|-----------------------------|-------------------|---------|---------|-----------------------------|-----------|------------|-------------------------|
| Beijing, China              | Suburban          | 2016.02 | -       | ~1400                       | -         | -          | (Wang et al., 2020b)    |
| Wangdu, China               | Rural             | 2014.07 | -       | ~200 (430)                  | 1.7±0.6   | 76.9       | (Tham et al., 2016)     |
| Mountain Tai, China         | Suburban          | 2014.07 | -       | 6.8±7.7                     | 0.5±0.4   | 74         | (Wang et al., 2017c)    |
| Jinan, China                | Urban             | 2014.08 | -       | 22±12 (278)                 | -         | -          | (Wang et al., 2017b)    |
| Shanghai, China             | Urban             | 2011.08 | 16±9    | 310±380                     | 1.1±1.1   | -          | (Wang et al., 2013)     |
| Taizhou, China              | Rural             | 2018.05 | 4.4±2.2 | 26.0±35.7 (492)             | 1.0×0.5   | 43 ± 52    | (Wang et al., 2020a)    |
| Taizhou, China              | Suburban          | 2018.05 | 4.4±2.2 | 26.0 ± 35.7                 | 1.2±0.4   | 55±68      | (Li et al., 2020)       |
| Changzhou, China            | Suburban          | 2019.05 | -       | 61.0 ± 63.1 (477.2)         | 2.8 ± 1.6 | -          | (Zhai et al., 2023)     |
| Hongkong, China             | Island            | 2012.08 | 7 ±12   | 17±33 (336)                 | -         | 76±61      | (Yan et al., 2019)      |
| Hongkong, China             | Coastal           | 2013.11 | -       | ~11800                      | 0.26      | ~13 h      | (Brown et al., 2016)    |
| Shenzhen, China             | Coastal           | 2019.09 | -       | 56±89 (1420)                | 2.9±0.5   | -          | (Niu et al., 2022)      |
| Heshan, China               | Urban             | 2019.09 | ~90     | 64±145                      | 2.5±2.1   | -          | (Wang et al., 2022)     |
| South China Sea             | Island            | 2021.11 | 10 ±13  | 120±129                     | 1.4±0.7   | 30±42      | (Wang et al., 2024)     |
| Seoul, Korea                | Urban, tower      | 2015.05 | -       | 4100±1200, 2600±1600 (5000) | 1.3       | 1800       | (Brown et al., 2017)    |
| Southern Spain              | Coastal           | 2008.11 | -       | ~500                        | -         | -          | (Crowley et al., 2011)  |
| Northwestern, Europe        | Coastal, airborne | 2010.07 | -       | 670                         | -         | 15~120 min | (Morgan et al., 2015)   |
| Taunus Observatory, Germany | Rural             | 2011.08 | -       | ~800                        | ~1.8      | -          | (Phillips et al., 2016) |
| East coast USA              | Coastal           | 2002.06 | 17      | 84                          | -         | -          | (Brown et al., 2004)    |
| California, USA             | Coastal           | 2004.01 | -       | ~200                        | -         | ~30 min    | (Wood et                |

|                             |          |         |   |          |     |   |                         |
|-----------------------------|----------|---------|---|----------|-----|---|-------------------------|
| USA                         |          |         |   |          |     |   | al., 2005)              |
| Salt Lake Valley, USA       | Airborne | 2017.01 | - | 0~2      | 0~2 | - | (McDuffie et al., 2019) |
| Lower Fraser Valley, Canada | Suburban | 2012.07 | - | 1.4 (23) | -   | - | (Osthoff et al., 2018)  |

61 The values in brackets are the maximum of N<sub>2</sub>O<sub>5</sub> concentration.

62

63

64 **Table S2.** Summary of global field observation results of  $\gamma(\text{N}_2\text{O}_5)$ .

| Location            | Period  | Site type | $\gamma(\text{N}_2\text{O}_5)$ | Method       | Reference            |
|---------------------|---------|-----------|--------------------------------|--------------|----------------------|
| Kunming, China      | 2021.04 | Suburban  | 0.0018~0.12 (0.23±0.21)        | AFTS         | This work            |
| Beijing, China      | 2016.02 | Suburban  | 0.001-0.02 (0.0046)            | Box model    | (Wang et al., 2020b) |
| Beijing, China      | 2016.05 | Rural     | 0.012-0.055 (0.034)            | Products     | (Wang et al., 2018)  |
| Beijing, China      | 2016.09 | Urban     | 0.025-0.072 (0.048)            | Steady-state | (Wang et al., 2017a) |
| Beijing, China      | 2018.1  | Urban     | 0.0075-0.0149                  | Steady-state | (Xia et al., 2021)   |
| Beijing, China      | 2019.01 | Tower     | 0.0005-0.2 (0.05)              | Box model    | (Chen et al., 2020)  |
| Beijing, China      | 2020.12 | Urban     | 0.0045-0.12 (0.042±0.026)      | AFTS         | (Chen et al., 2022)  |
| Wangdu, China       | 2014.06 | Rural     | 0.005-0.039                    | Products     | (Tham et al., 2018)  |
| Wangdu, China       | 2014.06 | Rural     | 0.0012-0.072                   | Steady-state | (Lu et al., 2022)    |
| Wangdu, China       | 2017.12 | Rural     | 0.006-0.015                    | Steady-state | (Xia et al., 2021)   |
| Mountain Tai, China | 2014.07 | Suburban  | 0.021-0.102 (0.061)            | Steady-state | (Wang et al., 2017c) |
| Mountain Tai, China | 2018.03 | Suburban  | 0.001-0.019 (0.01)             | AFTS         | (Yu et al., 2020)    |
| Jinan, China        | 2014.08 | Urban     | 0.042-0.092 (0.069)            | Steady-state | (Wang et al., 2017b) |
| Taizhou, China      | 2018.06 | Suburban  | 0.027-0.107 (0.08)             | Steady-state | (Li et al., 2020)    |

| <b>Location</b>       | <b>Period</b> | <b>Site type</b> | <b><math>\gamma(\text{N}_2\text{O}_5)</math></b>                      | <b>Method</b>                    | <b>Reference</b>        |
|-----------------------|---------------|------------------|-----------------------------------------------------------------------|----------------------------------|-------------------------|
| Changzhou, China      | 2019.06       | Suburban         | 0.057-0.123<br>0.001-0.024                                            | Steady-state<br>Parameterization | (Zhai et al., 2023)     |
| Hongkong, China       | 2013.11       | Suburban         | 0.004-0.029 (0.014)                                                   | Steady-state                     | (Brown et al., 2016)    |
| Hongkong, China       | 2013.11       | Suburban         | 0.0005-0.016 (0.004)                                                  | Box model                        | (Yun et al., 2018)      |
| Heshan, China         | 2017.03       | Suburban         | 0.002-0.067 (0.02)                                                    | AFTS                             | (Yu et al., 2020)       |
| Heshan, China         | 2019.10       | Urban            | 0.0019-0.077 (0.0317)                                                 | Products                         | (Wang et al., 2022)     |
| Shenzhen, China       | 2019.10       | Coastal          | 0.002-0.068<br>(0.027 $\pm$ 0.02)<br>0.005-0.08<br>(0.031 $\pm$ 0.02) | Products<br>Box model            | (Niu et al., 2022)      |
| New England, USA      | 2002.08       | Ship             | 0.03-0.04                                                             | Steady-state                     | (Aldener et al., 2006)  |
| New England, USA      | 2004.02       | Airborne         | 0.0016-0.02                                                           | Steady-state                     | (Brown et al., 2006)    |
| Texas, USA            | 2006.10       | Airborne         | 0.0005-0.006 (0.0039)                                                 | Steady-state                     | (Brown et al., 2009)    |
| Boulder, USA          | 2008.07       | Tower            | 0.0009-0.012 (0.003)                                                  | AFTS                             | (Bertram et al., 2009)  |
| Seattle, USA          | 2008.08       | Coastal          | 0.005-0.04                                                            | AFTS                             | (Bertram et al., 2009)  |
| California, USA       | 2009.09       | Coastal          | 0.00003-0.029 (0.0054)                                                | AFTS                             | (Riedel et al., 2012)   |
| Los Angeles, USA      | 2010.05       | Airborne         | 0.001-0.01                                                            | Steady-state                     | (Chang et al., 2016)    |
| Colorado, USA         | 2011.02       | Tower            | 0.002-0.1 (0.04)                                                      | Box model                        | (Wagner et al., 2013)   |
| Eastern, USA          | 2015.02       | Airborne         | 0.00002-0.175 (0.014)                                                 | Box model                        | (McDuffie et al., 2018) |
| Salt Lake Valley, USA | 2017.01       | Airborne         | 0.001-0.1 (0.076)                                                     | Box model                        | (McDuffie et al., 2019) |
| NW Europe/UK          | 2010.06       | Airborne         | 0.0076-0.03                                                           | Steady-state                     | (Morgan et al.,         |

| <b>Location</b> | <b>Period</b> | <b>Site type</b> | <b><math>\gamma(\text{N}_2\text{O}_5)</math></b> | <b>Method</b>             | <b>Reference</b>                    |
|-----------------|---------------|------------------|--------------------------------------------------|---------------------------|-------------------------------------|
| SW Germany      | 2011.08       | Suburban         | 0.004-0.11 (0.028)                               | Products,<br>Steady-state | 2015)<br>(Phillips et<br>al., 2016) |

65 The values in brackets are mean values of  $\gamma(\text{N}_2\text{O}_5)$ .

66 AFTS: aerosol flow tube system;

67 Steady-state: steady state approximation;

68 Products: products formation rate analysis;

69 Box model: inverse iterative box model simulation.



**Table S3.** Summary of the details and performances of the parameterizations discussed in this study.

| Parameterization name | Factors considered                                                                                        | Parameterization                                                                                                                                                                                                                                                                                                                                                                                                                                                                                                                                                                                                                                                                                                                                                                                          | Reference             | R <sup>2</sup> | RMSE   | Median |
|-----------------------|-----------------------------------------------------------------------------------------------------------|-----------------------------------------------------------------------------------------------------------------------------------------------------------------------------------------------------------------------------------------------------------------------------------------------------------------------------------------------------------------------------------------------------------------------------------------------------------------------------------------------------------------------------------------------------------------------------------------------------------------------------------------------------------------------------------------------------------------------------------------------------------------------------------------------------------|-----------------------|----------------|--------|--------|
| RIE03                 | Mass concentration of aerosol sulfate and nitrate (μg/m <sup>3</sup> )                                    | $\gamma = f \times r_1 + (1-f) \times r_2$<br>where,<br>$r_1 = 0.02$<br>$r_2 = 0.002$<br>$f = \text{mass SO}_4^{2-} / (\text{mass SO}_4^{2-} + \text{mass NO}_3^-)$                                                                                                                                                                                                                                                                                                                                                                                                                                                                                                                                                                                                                                       | (Riemer et al., 2003) | 0              | 0.0223 | 0.017  |
| DAV08                 | [SO <sub>4</sub> <sup>2-</sup> ], [NO <sub>3</sub> <sup>-</sup> ], [NH <sub>4</sub> <sup>+</sup> ], RH, T | $\gamma = x_1 \times \gamma_1^* + x_2 \times \gamma_2^* + x_3 \times \gamma_3^*$<br>where,<br>$\lambda_1 = -4.10612 + 0.02386 \times \text{RH} - 0.23771 \times \max((T-291), 0)$<br>$\gamma_1 = 1 / (1 + e^{-\lambda_1})$<br>$\gamma_1^* = \min(\gamma_1, 0.08585)$<br>$\lambda_2 = (-4.10612 - 0.80570) + 0.02386 \times \text{RH} + (-0.23771 + 0.10225) \times \max((T-291), 0)$<br>$\gamma_2 = 1 / (1 + e^{-\lambda_2})$<br>$\gamma_2^* = \min(\gamma_2, 0.053)$<br>$\lambda_3 = -8.10774 + 0.04902 \times \text{RH}$<br>$\gamma_3 = 1 / (1 + e^{-\lambda_3})$<br>$\gamma_3^* = \min(\gamma_3, 0.0154)$<br>$x_3 = [\text{NO}_3^-] / ([\text{NO}_3^-] + [\text{SO}_4^{2-}])$<br>$x_2 = \max(0, \min(1 - x_3, [\text{NH}_4^+] / ([\text{NO}_3^-] + [\text{SO}_4^{2-}]) - 1))$<br>$x_1 = 1 - x_2 - x_3$ | (Davis et al., 2008)  | 0.02           | 00317  | 0.034  |

| Parameterization name | Factors considered                                                                               | Parameterization                                                                                                                                                                                                                                                                                                                                                                                                                                                                                                                                                             | Reference                    | R <sup>2</sup> | RMSE   | Median |
|-----------------------|--------------------------------------------------------------------------------------------------|------------------------------------------------------------------------------------------------------------------------------------------------------------------------------------------------------------------------------------------------------------------------------------------------------------------------------------------------------------------------------------------------------------------------------------------------------------------------------------------------------------------------------------------------------------------------------|------------------------------|----------------|--------|--------|
|                       |                                                                                                  | (1=NH <sub>4</sub> HSO <sub>4</sub> , 2=(NH <sub>4</sub> ) <sub>2</sub> SO <sub>4</sub> , 3=NH <sub>4</sub> NO <sub>3</sub> )                                                                                                                                                                                                                                                                                                                                                                                                                                                |                              |                |        |        |
| BT09                  | ALWC,<br>[NO <sub>3</sub> <sup>-</sup> ], [Cl <sup>-</sup> ],<br>V <sub>a</sub> , S <sub>a</sub> | $\gamma = \frac{4 V_a}{c S_a} K_H k'_{2f} \left( 1 - \frac{1}{\left( \frac{k_3 [\text{H}_2\text{O}]}{k_{2b} [\text{NO}_3^-]} \right) + 1 + \left( \frac{k_4 [\text{Cl}^-]}{k_{2b} [\text{NO}_3^-]} \right)} \right)$ <p>where,<br/> <math>K_H=51</math>, Henry's Law Coefficient (Fried et al., 1994)<br/> <math>k'_{2f}=\beta - \beta_e^{-\delta[\text{H}_2\text{O}]}</math><br/> <math>\beta=1.15 \times 10^6</math> (s<sup>-1</sup>)<br/> <math>\delta=0.13</math> (M<sup>-1</sup>)<br/> <math>\frac{k_3}{k_{2b}}=0.06</math><br/> <math>\frac{k_4}{k_{2b}}=29</math></p> | (Bertram and Thornton, 2009) | 0.06           | 0.0228 | 0.034  |
| BT09 w/o Cl           | ALWC,<br>[NO <sub>3</sub> <sup>-</sup> ], V <sub>a</sub> ,<br>S <sub>a</sub>                     | $\gamma = \frac{4 V_a}{c S_a} K_H k'_{2f} \left( 1 - \frac{1}{\left( \frac{k_3 [\text{H}_2\text{O}]}{k_{2b} [\text{NO}_3^-]} \right) + 1} \right)$ <p>parameters are same as BT09.</p>                                                                                                                                                                                                                                                                                                                                                                                       | (Bertram and Thornton, 2009) | 0.07           | 0.0202 | 0.020  |
| GRI09                 | ALWC,<br>[NO <sub>3</sub> <sup>-</sup> ], V <sub>a</sub> ,<br>S <sub>a</sub>                     | $\gamma = \frac{4 V_a}{c S_a} K_H k'_{2f} \left( 1 - \frac{1}{\left( \frac{k_3 [\text{H}_2\text{O}]}{k_{2b} [\text{NO}_3^-]} \right) + 1} \right)$                                                                                                                                                                                                                                                                                                                                                                                                                           | (Griffiths et al., 2009)     | 0.06           | 0.0533 | 0.063  |

| Parameterization name | Factors considered                                              | Parameterization                                                                                                                                                                                                                                                                                                                                                                                                    | Reference               | R <sup>2</sup> | RMSE   | Median |
|-----------------------|-----------------------------------------------------------------|---------------------------------------------------------------------------------------------------------------------------------------------------------------------------------------------------------------------------------------------------------------------------------------------------------------------------------------------------------------------------------------------------------------------|-------------------------|----------------|--------|--------|
|                       |                                                                 | Where,<br>$K_H=51$<br>$\frac{k_3}{k_{2b}}=1/30$<br>$k'_{2f}=5 \times 10^6$                                                                                                                                                                                                                                                                                                                                          |                         |                |        |        |
| YU20                  | ALWC,<br>$[\text{NO}_3^-]$ , $[\text{Cl}^-]$ ,<br>$V_a$ , $S_a$ | $\gamma = \frac{4 V_a}{c S_a} K_H k'_{2f} \left( 1 - \frac{1}{\left( \frac{k_3 [\text{H}_2\text{O}]}{k_{2b} [\text{NO}_3^-]} \right) + 1 + \left( \frac{k_4 [\text{Cl}^-]}{k_{2b} [\text{NO}_3^-]} \right)} \right)$ <p>where,<br/> <math>K_H=51</math><br/> <math>k'_{2f}=[\text{H}_2\text{O}] \times 3 \times 10^4</math><br/> <math>\frac{k_3}{k_{2b}}=0.033</math><br/> <math>\frac{k_4}{k_{2b}}=3.4</math></p> | (Yu et al., 2020)       | 0.09           | 0.02   | 0.019  |
| EJ05                  | Mass fraction of aerosol sulfate and organic, RH,               | $\gamma = \text{mass SO}_4^{2-} / \text{dry mass} \times \gamma_1 + \text{mass organic} / \text{dry mass} \times \gamma_2$ <p>where,<br/> <math>\gamma_1 = \alpha \times 10^\beta</math><br/> <math>\alpha = 2.79 \times 10^{-4} + 1.3 \times 10^{-4} \times \text{RH} - 3.43 \times 10^{-6} \times \text{RH}^2 + 7.52 \times 10^{-8} \times \text{RH}^3</math></p>                                                 | (Evans and Jacob, 2005) | 0              | 0.0228 | 0.019  |

| Parameterization name | Factors considered                                                                                                       | Parameterization                                                                                                                                                                                                                                                                                                                                                                                                                                                                                                                                                                                                                                                                                                                                                                                                                                                                 | Reference                                                               | R <sup>2</sup>     | RMSE                 | Median              |
|-----------------------|--------------------------------------------------------------------------------------------------------------------------|----------------------------------------------------------------------------------------------------------------------------------------------------------------------------------------------------------------------------------------------------------------------------------------------------------------------------------------------------------------------------------------------------------------------------------------------------------------------------------------------------------------------------------------------------------------------------------------------------------------------------------------------------------------------------------------------------------------------------------------------------------------------------------------------------------------------------------------------------------------------------------|-------------------------------------------------------------------------|--------------------|----------------------|---------------------|
|                       | T                                                                                                                        | $\beta=4 \times 10^{-2} \times (T-294)$ , (T $\geq$ 282K)<br>$\beta=-0.48$ , (T<282K)<br>$\gamma_2=RH \times 5.2 \times 10^{-4}$ , (RH<57%)<br>$\gamma_2=0.03$ , (RH $\geq$ 57%)                                                                                                                                                                                                                                                                                                                                                                                                                                                                                                                                                                                                                                                                                                 |                                                                         |                    |                      |                     |
| BT09+Rie09            | ALWC,<br>[NO <sub>3</sub> <sup>-</sup> ], [Cl <sup>-</sup> ],<br>V <sub>a</sub> , S <sub>a</sub> ,<br>organic<br>coating | $\frac{1}{\gamma} = \frac{1}{\gamma_{core}} + \frac{1}{\gamma_{org.coat}}$ <p>where,<br/> <math>\gamma_{core}</math>=BT09<br/> <math display="block">\gamma_{org.coat} = \frac{4RTD_{org}H_{org}R_c}{clR_p}</math> R, gas constant (atm·m<sup>3</sup>/mol·K)<br/> T, temperature (K)<br/> D<sub>org</sub>H<sub>org</sub>=εD<sub>aq</sub>H<sub>aq</sub><br/> ε=0.03<br/> H<sub>aq</sub>=5000, Henry's Law Coefficient in aqueous core (mol m<sup>-3</sup> atm<sup>-1</sup>)<br/> D<sub>aq</sub>=1×10<sup>-9</sup>, N<sub>2</sub>O<sub>5</sub> Liquid Diffusion Coefficient (m<sup>2</sup> s<sup>-1</sup>)<br/> R<sub>p</sub>, median particle total radius, (m)<br/> R<sub>c</sub>=R<sub>p</sub>-l, particle core radius (m)<br/> l=R<sub>p</sub>×(1-β<sup>1/3</sup>), organic coating thickness (m)<br/> β=V<sub>inorganic</sub>/(V<sub>organic</sub>+V<sub>inorganic</sub>)</p> | (Bertram and Thornton, 2009; Anttila et al., 2006; Riemer et al., 2009) | 0.03               | 0.0278               | 0.012               |
| BT09+Rie09(wG14)      | ALWC,<br>[NO <sub>3</sub> <sup>-</sup> ], [Cl <sup>-</sup> ],                                                            | $\frac{1}{\gamma} = \frac{1}{\gamma_{core}} + \frac{1}{\gamma_{org.coat}}$                                                                                                                                                                                                                                                                                                                                                                                                                                                                                                                                                                                                                                                                                                                                                                                                       | (Gaston et al., 2014)                                                   | 0.07<br>(O/C=0.8); | 0.0201<br>(O/C=0.8); | 0.019<br>(O/C=0.8); |

| Parameterization name | Factors considered                                                                                                                   | Parameterization                                                                                                                                                                                                                                                                                                                                                                                                 | Reference               | R <sup>2</sup>                          | RMSE                                        | Median                                    |
|-----------------------|--------------------------------------------------------------------------------------------------------------------------------------|------------------------------------------------------------------------------------------------------------------------------------------------------------------------------------------------------------------------------------------------------------------------------------------------------------------------------------------------------------------------------------------------------------------|-------------------------|-----------------------------------------|---------------------------------------------|-------------------------------------------|
|                       | V <sub>a</sub> , S <sub>a</sub> ,<br>organic<br>coating, O/C,<br>RH                                                                  | same as BT09+Rie09 except,<br>$\varepsilon=0.06$ , (RH $\leq$ 30% and O/C $\geq$ 0.7)<br>$\varepsilon=0.008$ , (RH $\leq$ 30% and O/C $\leq$ 0.7)<br>$\varepsilon=0.3$ , (30% $\leq$ RH $\leq$ 70% and O/C $\geq$ 0.7)<br>$\varepsilon=0.05$ , (30% $\leq$ RH $\leq$ 70% and O/C $\leq$ 0.7)<br>$\varepsilon=1.0$ , (70% $\leq$ RH and O/C $\geq$ 0.7)<br>$\varepsilon=0.8$ , (70% $\leq$ RH and O/C $\leq$ 0.7) |                         | 0.07<br>(O/C=0.5)                       | 0.0248<br>(O/C=0.5)                         | 0.006<br>(O/C=0.5)                        |
| MD18                  | ALWC,<br>[NO <sub>3</sub> <sup>-</sup> ], [Cl <sup>-</sup> ],<br>V <sub>a</sub> , S <sub>a</sub> ,<br>organic<br>coating, O/C,<br>RH | $\frac{1}{\gamma} = \frac{1}{\gamma_{core}} + \frac{1}{\gamma_{org.coat}}$ same as BT09+Rie09 except,<br>$\gamma_{core}$ =BT09 w/o Cl<br>$k'_{2f}$ =[H <sub>2</sub> O] $\times$ 2.14 $\times$ 10 <sup>5</sup><br>$\frac{k_3}{k_{2b}}$ =0.04<br>$\varepsilon=0.15\times$ O/C+0.0016 $\times$ RH                                                                                                                   | (McDuffie et al., 2018) | 0.05<br>(O/C=0.8);<br>0.04<br>(O/C=0.5) | 0.0205<br>(O/C=0.8);<br>0.0208<br>(O/C=0.5) | 0.022<br>(O/C=0.8);<br>0.018<br>(O/C=0.5) |

## References:

Aldener, M., Brown, S. S., Stark, H., Williams, E. J., Lerner, B. M., Kuster, W. C., Goldan, P. D., Quinn, P. K., Bates, T. S., Fehsenfeld, F. C., and Ravishankara, A. R.: Reactivity and loss mechanisms of  $\text{NO}_3$  and  $\text{N}_2\text{O}_5$  in a polluted marine environment: Results from in situ measurements during New England Air Quality Study 2002, *Journal of Geophysical Research-Atmospheres*, 111, 10.1029/2006jd007252, 2006.

Anttila, T., Kiendler-Scharr, A., Tillmann, R., and Mentel, T. F.: On the reactive uptake of gaseous compounds by organic-coated aqueous aerosols: Theoretical analysis and application to the heterogeneous hydrolysis of  $\text{N}_2\text{O}_5$ , *Journal of Physical Chemistry A*, 110, 10435-10443, 10.1021/jp062403c, 2006.

Bertram, T. H., and Thornton, J. A.: Toward a general parameterization of  $\text{N}_2\text{O}_5$  reactivity on aqueous particles: the competing effects of particle liquid water, nitrate and chloride, *Atmospheric Chemistry and Physics*, 9, 8351-8363, 10.5194/acp-9-8351-2009, 2009.

Bertram, T. H., Thornton, J. A., and Riedel, T. P.: An experimental technique for the direct measurement of  $\text{N}_2\text{O}_5$  reactivity on ambient particles, *Atmospheric Measurement Techniques*, 2, 231-242, 10.5194/amt-2-231-2009, 2009.

Brown, S. S., Dibb, J. E., Stark, H., Aldener, M., Vozella, M., Whitlow, S., Williams, E. J., Lerner, B. M., Jakoubek, R., Middlebrook, A. M., DeGouw, J. A., Warneke, C., Goldan, P. D., Kuster, W. C., Angevine, W. M., Sueper, D. T., Quinn, P. K., Bates, T. S., Meagher, J. F., Fehsenfeld, F. C., and Ravishankara, A. R.: Nighttime removal of  $\text{NO}_x$  in the summer marine boundary layer, *Geophysical Research Letters*, 31, 10.1029/2004gl019412, 2004.

Brown, S. S., Ryerson, T. B., Wollny, A. G., Brock, C. A., Peltier, R., Sullivan, A. P., Weber, R. J., Dube, W. P., Trainer, M., Meagher, J. F., Fehsenfeld, F. C., and Ravishankara, A. R.: Variability in nocturnal nitrogen oxide processing and its role in regional air quality, *Science*, 311, 67-70, 10.1126/science.1120120, 2006.

Brown, S. S., Dube, W. P., Fuchs, H., Ryerson, T. B., Wollny, A. G., Brock, C. A., Bahreini, R., Middlebrook, A. M., Neuman, J. A., Atlas, E., Roberts, J. M., Osthoff, H. D., Trainer, M., Fehsenfeld, F. C., and Ravishankara, A. R.: Reactive uptake coefficients for  $\text{N}_2\text{O}_5$  determined from aircraft measurements during the Second Texas Air Quality Study: Comparison to current model parameterizations, *Journal of Geophysical Research-Atmospheres*, 114, 10.1029/2008jd011679, 2009.

Brown, S. S., Dube, W. P., Tham, Y. J., Zha, Q. Z., Xue, L. K., Poon, S., Wang, Z., Blake, D. R., Tsui, W., Parrish, D. D., and Wang, T.: Nighttime chemistry at a high altitude site above Hong Kong, *Journal of Geophysical Research-Atmospheres*, 121, 2457-2475, 10.1002/2015jd024566, 2016.

Brown, S. S., An, H., Lee, M., Park, J. H., Lee, S. D., Fibiger, D. L., McDuffie, E. E., Dube, W. P., Wagner, N. L., and Min, K. E.: Cavity enhanced spectroscopy for measurement of nitrogen oxides in the Anthropocene: results from the Seoul tower during MAPS 2015, *Faraday Discussions*, 200, 529-557, 10.1039/c7fd00001d, 2017.

Chang, W. L., Brown, S. S., Stutz, J., Middlebrook, A. M., Bahreini, R., Wagner, N. L., Dube, W. P., Pollack, I. B., Ryerson, T. B., and Riemer, N.: Evaluating  $\text{N}_2\text{O}_5$  heterogeneous hydrolysis parameterizations for CalNex 2010, *Journal of Geophysical Research-Atmospheres*, 121, 5051-5070, 10.1002/2015jd024737, 2016.

Chen, X., Wang, H., Zhai, T., Li, C., and Lu, K.: Direct measurement of  $\text{N}_2\text{O}_5$  heterogeneous uptake coefficients on ambient aerosols via an aerosol flow tube system: design, characterization and performance, *Atmospheric Measurement Techniques*, 15, 7019-7037, 10.5194/amt-15-7019-2022, 2022.

Chen, X. R., Wang, H. C., Lu, K. D., Li, C. M., Zhai, T. Y., Tan, Z. F., Ma, X. F., Yang, X. P., Liu, Y. H., Chen, S. Y., Dong, H. B., Li, X., Wu, Z. J., Hu, M., Zeng, L. M., and Zhang, Y. H.: Field Determination of Nitrate Formation Pathway in Winter Beijing, *Environmental Science & Technology*, 54, 9243-9253, 10.1021/acs.est.0c00972, 2020.

Crowley, J. N., Thieser, J., Tang, M. J., Schuster, G., Bozem, H., Beygi, Z. H., Fischer, H., Diesch, J. M., Drewnick, F., Borrmann, S., Song, W., Yassaa, N., Williams, J., Pöhler, D., Platt, U., and Lelieveld, J.: Variable lifetimes and loss mechanisms for  $\text{NO}_3$  and  $\text{N}_2\text{O}_5$  during the DOMINO campaign: contrasts between marine, urban and continental air, *Atmospheric Chemistry and Physics*, 11, 10853-10870, 10.5194/acp-11-10853-2011, 2011.

Davis, J. M., Bhavsar, P. V., and Foley, K. M.: Parameterization of  $\text{N}_2\text{O}_5$  reaction probabilities on the surface of particles containing ammonium, sulfate, and nitrate, *Atmospheric Chemistry and Physics*, 8, 5295-5311, 10.5194/acp-8-5295-2008, 2008.

Evans, M. J., and Jacob, D. J.: Impact of new laboratory studies of  $\text{N}_2\text{O}_5$  hydrolysis on global model budgets of tropospheric nitrogen oxides, ozone, and OH, *Geophysical Research Letters*, 32, 10.1029/2005gl022469, 2005.

Fried, A., Henry, B. E., Calvert, J. G., and Mozurkewich, M.: The reaction probability of  $\text{N}_2\text{O}_5$  with sulfuric-acid aerosols at stratospheric temperatures and compositions, *Journal of Geophysical Research-Atmospheres*, 99, 3517-3532, 10.1029/93jd01907, 1994.

Gaston, C. J., Thornton, J. A., and Ng, N. L.: Reactive uptake of  $\text{N}_2\text{O}_5$  to internally mixed inorganic and organic particles: the role of organic carbon oxidation state and inferred organic phase separations, *Atmospheric Chemistry and Physics*, 14, 5693-5707, 10.5194/acp-14-5693-2014, 2014.

Griffiths, P. T., Badger, C. L., Cox, R. A., Folkers, M., Henk, H. H., and Mentel, T. F.: Reactive Uptake of  $\text{N}_2\text{O}_5$  by Aerosols Containing Dicarboxylic Acids. Effect of Particle Phase, Composition, and Nitrate Content, *Journal of Physical Chemistry A*, 113, 5082-5090, 10.1021/jp8096814, 2009.

Li, Z. Y., Xie, P. H., Hu, R. Z., Wang, D., Jin, H. W., Chen, H., Lin, C., and Liu, W. Q.: Observations of  $\text{N}_2\text{O}_5$  and  $\text{NO}_3$  at a suburban environment in Yangtze river delta in China: Estimating heterogeneous  $\text{N}_2\text{O}_5$  uptake coefficients, *Journal of Environmental Sciences*, 95, 248-255, 10.1016/j.jes.2020.04.041, 2020.

Lu, X., Qin, M., Xie, P. H., Duan, J., Fang, W., and Liu, W. Q.: Observation of ambient  $\text{NO}_3$  radicals by LP-DOAS at a rural site in North China Plain, *Science of the*

Total Environment, 804, 10.1016/j.scitotenv.2021.149680, 2022.

McDuffie, E. E., Fibiger, D. L., Dube, W. P., Lopez-Hilfiker, F., Lee, B. H., Thornton, J. A., Shah, V., Jaegle, L., Guo, H. Y., Weber, R. J., Reeves, J. M., Weinheimer, A. J., Schroder, J. C., Campuzano-Jost, P., Jimenez, J. L., Dibb, J. E., Veres, P., Ebben, C., Sparks, T. L., Wooldridge, P. J., Cohen, R. C., Hornbrook, R. S., Apel, E. C., Campos, T., Hall, S. R., Ullmann, K., and Brown, S. S.: Heterogeneous  $\text{N}_2\text{O}_5$  Uptake During Winter: Aircraft Measurements During the 2015 WINTER Campaign and Critical Evaluation of Current Parameterizations, *Journal of Geophysical Research-Atmospheres*, 123, 4345-4372, 10.1002/2018jd028336, 2018.

McDuffie, E. E., Womack, C. C., Fibiger, D. L., Dube, W. P., Franchin, A., Middlebrook, A. M., Goldberger, L., Lee, B., Thornton, J. A., Moravek, A., Murphy, J. G., Baasandorj, M., and Brown, S. S.: On the contribution of nocturnal heterogeneous reactive nitrogen chemistry to particulate matter formation during wintertime pollution events in Northern Utah, *Atmospheric Chemistry and Physics*, 19, 9287-9308, 10.5194/acp-19-9287-2019, 2019.

Morgan, W. T., Ouyang, B., Allan, J. D., Aruffo, E., Di Carlo, P., Kennedy, O. J., Lowe, D., Flynn, M. J., Rosenberg, P. D., Williams, P. I., Jones, R., McFiggans, G. B., and Coe, H.: Influence of aerosol chemical composition on  $\text{N}_2\text{O}_5$  uptake: airborne regional measurements in northwestern Europe, *Atmospheric Chemistry and Physics*, 15, 973-990, 10.5194/acp-15-973-2015, 2015.

Niu, Y. B., Zhu, B., He, L. Y., Wang, Z., Lin, X. Y., Tang, M. X., and Huang, X. F.: Fast Nocturnal Heterogeneous Chemistry in a Coastal Background Atmosphere and Its Implications for Daytime Photochemistry, *Journal of Geophysical Research-Atmospheres*, 127, 10.1029/2022jd036716, 2022.

Osthoff, H. D., Odame-Ankrah, C. A., Taha, Y. M., Tokarek, T. W., Schiller, C. L., Haga, D., Jones, K., and Vingarzan, R.: Low levels of nitryl chloride at ground level: nocturnal nitrogen oxides in the Lower Fraser Valley of British Columbia, *Atmospheric Chemistry and Physics*, 18, 6293-6315, 10.5194/acp-18-6293-2018, 2018.

Phillips, G. J., Thieser, J., Tang, M. J., Sobanski, N., Schuster, G., Fachinger, J., Drewnick, F., Borrmann, S., Bingemer, H., Lelieveld, J., and Crowley, J. N.: Estimating  $\text{N}_2\text{O}_5$  uptake coefficients using ambient measurements of  $\text{NO}_3$ ,  $\text{N}_2\text{O}_5$ ,  $\text{ClNO}_2$  and particle-phase nitrate, *Atmospheric Chemistry and Physics*, 16, 13231-13249, 10.5194/acp-16-13231-2016, 2016.

Riedel, T. P., Bertram, T. H., Ryder, O. S., Liu, S., Day, D. A., Russell, L. M., Gaston, C. J., Prather, K. A., and Thornton, J. A.: Direct  $\text{N}_2\text{O}_5$  reactivity measurements at a polluted coastal site, *Atmospheric Chemistry and Physics*, 12, 2959-2968, 10.5194/acp-12-2959-2012, 2012.

Rierner, N., Vogel, H., Vogel, B., Schell, B., Ackermann, I., Kessler, C., and Hass, H.: Impact of the heterogeneous hydrolysis of  $\text{N}_2\text{O}_5$  on chemistry and nitrate aerosol formation in the lower troposphere under photochemical conditions, *Journal of Geophysical Research-Atmospheres*, 108, 10.1029/2002jd002436, 2003.

Rierner, N., Vogel, H., Vogel, B., Anttila, T., Kiendler-Scharr, A., and Mentel, T.



F.: Relative importance of organic coatings for the heterogeneous hydrolysis of  $\text{N}_2\text{O}_5$  during summer in Europe, *Journal of Geophysical Research-Atmospheres*, 114, 10.1029/2008jd011369, 2009.

Tham, Y. J., Wang, Z., Li, Q. Y., Yun, H., Wang, W. H., Wang, X. F., Xue, L. K., Lu, K. D., Ma, N., Bohn, B., Li, X., Kecorius, S., Gross, J., Shao, M., Wiedensohler, A., Zhang, Y. H., and Wang, T.: Significant concentrations of nitryl chloride sustained in the morning: investigations of the causes and impacts on ozone production in a polluted region of northern China, *Atmospheric Chemistry and Physics*, 16, 14959-14977, 10.5194/acp-16-14959-2016, 2016.

Tham, Y. J., Wang, Z., Li, Q. Y., Wang, W. H., Wang, X. F., Lu, K. D., Ma, N., Yan, C., Kecorius, S., Wiedensohler, A., Zhang, Y. H., and Wang, T.: Heterogeneous  $\text{N}_2\text{O}_5$  uptake coefficient and production yield of  $\text{ClNO}_2$  in polluted northern China: roles of aerosol water content and chemical composition, *Atmospheric Chemistry and Physics*, 18, 13155-13171, 10.5194/acp-18-13155-2018, 2018.

Wagner, N. L., Riedel, T. P., Young, C. J., Bahreini, R., Brock, C. A., Dube, W. P., Kim, S., Middlebrook, A. M., Ozturk, F., Roberts, J. M., Russo, R., Sive, B., Swarthout, R., Thornton, J. A., VandenBoer, T. C., Zhou, Y., and Brown, S. S.:  $\text{N}_2\text{O}_5$  uptake coefficients and nocturnal  $\text{NO}_2$  removal rates determined from ambient wintertime measurements, *Journal of Geophysical Research-Atmospheres*, 118, 9331-9350, 10.1002/jgrd.50653, 2013.

Wang, H. C., Lu, K. D., Chen, X. R., Zhu, Q. D., Chen, Q., Guo, S., Jiang, M. Q., Li, X., Shang, D. J., Tan, Z. F., Wu, Y. S., Wu, Z. J., Zou, Q., Zheng, Y., Zeng, L. M., Zhu, T., Hu, M., and Zhang, Y. H.: High  $\text{N}_2\text{O}_5$  Concentrations Observed in Urban Beijing: Implications of a Large Nitrate Formation Pathway, *Environmental Science & Technology Letters*, 4, 416-420, 10.1021/acs.estlett.7b00341, 2017a.

Wang, H. C., Lu, K. D., Guo, S., Wu, Z. J., Shang, D. J., Tan, Z. F., Wang, Y. J., Le Breton, M., Lou, S. R., Tang, M. J., Wu, Y. S., Zhu, W. F., Zheng, J., Zeng, L. M., Hallquist, M., Hu, M., and Zhang, Y. H.: Efficient  $\text{N}_2\text{O}_5$  uptake and  $\text{NO}_3$  oxidation in the outflow of urban Beijing, *Atmospheric Chemistry and Physics*, 18, 9705-9721, 10.5194/acp-18-9705-2018, 2018.

Wang, H. C., Chen, X. R., Lu, K. D., Hu, R. Z., Li, Z. Y., Wang, H. L., Ma, X. F., Yang, X. P., Chen, S. Y., Dong, H. B., Liu, Y., Fang, X., Zeng, L. M., Hu, M., and Zhang, Y. H.:  $\text{NO}_3$  and  $\text{N}_2\text{O}_5$  chemistry at a suburban site during the EXPLORE-YRD campaign in 2018, *Atmospheric Environment*, 224, 10.1016/j.atmosenv.2019.117180, 2020a.

Wang, H. C., Chen, X. R., Lu, K. D., Tan, Z. F., Ma, X. F., Wu, Z. J., Li, X., Liu, Y. H., Shang, D. J., Wu, Y. S., Zeng, L. M., Hu, M., Schmitt, S., Kiendler-Scharr, A., Wahner, A., and Zhang, Y. H.: Wintertime  $\text{N}_2\text{O}_5$  uptake coefficients over the North China Plain, *Science Bulletin*, 65, 765-774, 10.1016/j.scib.2020.02.006, 2020b.

Wang, H. C., Yuan, B., Zheng, E., Zhang, X. X., Wang, J., Lu, K. D., Ye, C. S., Yang, L., Huang, S., Hu, W. W., Yang, S. X., Peng, Y. W., Qi, J. P., Wang, S. H., He, X. J., Chen, Y. B., Li, T. G., Wang, W. J., Huangfu, Y. B., Li, X. B., Cai, M. F., Wang, X.

M., and Shao, M.: Formation and impacts of nitryl chloride in Pearl River Delta, *Atmospheric Chemistry and Physics*, 22, 14837-14858, 10.5194/acp-22-14837-2022, 2022.

Wang, J., Wang, H. C., Tham, Y. J., Ming, L. L., Zheng, Z. L., Fang, G. Z., Sun, C. Z., Ling, Z. H., Zhao, J., and Fan, S. J.: Measurement report: Atmospheric nitrate radical chemistry in the South China Sea influenced by the urban outflow of the Pearl River Delta, *Atmospheric Chemistry and Physics*, 24, 977-992, 10.5194/acp-24-977-2024, 2024.

Wang, S. S., Shi, C. Z., Zhou, B., Zhao, H., Wang, Z. R., Yang, S. N., and Chen, L. M.: Observation of NO<sub>3</sub> radicals over Shanghai, China, *Atmospheric Environment*, 70, 401-409, 10.1016/j.atmosenv.2013.01.022, 2013.

Wang, X. F., Wang, H., Xue, L. K., Wang, T., Wang, L. W., Gu, R. R., Wang, W. H., Tham, Y. J., Wang, Z., Yang, L. X., Chen, J. M., and Wang, W. X.: Observations of N<sub>2</sub>O<sub>5</sub> and ClNO<sub>2</sub> at a polluted urban surface site in North China: High N<sub>2</sub>O<sub>5</sub> uptake coefficients and low ClNO<sub>2</sub> product yields, *Atmospheric Environment*, 156, 125-134, 10.1016/j.atmosenv.2017.02.035, 2017b.

Wang, Z., Wang, W. H., Tham, Y. J., Li, Q. Y., Wang, H., Wen, L., Wang, X. F., and Wang, T.: Fast heterogeneous N<sub>2</sub>O<sub>5</sub> uptake and ClNO<sub>2</sub> production in power plant and industrial plumes observed in the nocturnal residual layer over the North China Plain, *Atmospheric Chemistry and Physics*, 17, 12361-12378, 10.5194/acp-17-12361-2017, 2017c.

Wood, E. C., Bertram, T. H., Wooldridge, P. J., and Cohen, R. C.: Measurements of N<sub>2</sub>O<sub>5</sub>, NO<sub>2</sub>, and O<sub>3</sub> east of the San Francisco Bay, *Atmospheric Chemistry and Physics*, 5, 483-491, 10.5194/acp-5-483-2005, 2005.

Xia, M., Peng, X., Wang, W. H., Yu, C. A., Wang, Z., Tham, Y. J., Chen, J. M., Chen, H., Mu, Y. J., Zhang, C. L., Liu, P. F., Xue, L. K., Wang, X. F., Gao, J., Li, H., and Wang, T.: Winter ClNO<sub>2</sub> formation in the region of fresh anthropogenic emissions: seasonal variability and insights into daytime peaks in northern China, *Atmospheric Chemistry and Physics*, 21, 15985-16000, 10.5194/acp-21-15985-2021, 2021.

Yan, C., Tham, Y. J., Zha, Q., Wang, X., Xue, L., Dai, J., Wang, Z., and Wang, T.: Fast heterogeneous loss of N<sub>2</sub>O<sub>5</sub> leads to significant nighttime NO<sub>x</sub> removal and nitrate aerosol formation at a coastal background environment of southern China, *Science of the Total Environment*, 677, 637-647, 10.1016/j.scitotenv.2019.04.389, 2019.

Yu, C., Wang, Z., Xia, M., Fu, X., Wang, W. H., Tham, Y. J., Chen, T. S., Zheng, P. G., Li, H. Y., Shan, Y., Wang, X. F., Xue, L. K., Zhou, Y., Yue, D. L., Ou, Y. B., Gao, J., Lu, K. D., Brown, S. S., Zhang, Y. H., and Wang, T.: Heterogeneous N<sub>2</sub>O<sub>5</sub> reactions on atmospheric aerosols at four Chinese sites: improving model representation of uptake parameters, *Atmospheric Chemistry and Physics*, 20, 4367-4378, 10.5194/acp-20-4367-2020, 2020.

Yun, H., Wang, T., Wang, W. H., Tham, Y. J., Li, Q. Y., Wang, Z., and Poon, S. C. N.: Nighttime NO<sub>x</sub> loss and ClNO<sub>2</sub> formation in the residual layer of a polluted region:

Insights from field measurements and an iterative box model, *Science of the Total Environment*, 622, 727-734, 10.1016/j.scitotenv.2017.11.352, 2018.

Zhai, T. Y., Lu, K. D., Wang, H. C., Lou, S. R., Chen, X. R., Hu, R. Z., and Zhang, Y. H.: Elucidate the formation mechanism of particulate nitrate based on direct radical observations in the Yangtze River Delta summer 2019, *Atmospheric Chemistry and Physics*, 23, 2379-2391, 10.5194/acp-23-2379-2023, 2023.
